# Supplementary material for: The trans fatty acid elaidate affects the global DNA methylation profile of cultured cells and in vivo
Source: PubMed Central journal article supplement (PMC4828757; doi:10.1186/s12944-016-0243-2), 2016-04-12
Supplement: 12944_2016_243_MOESM1_ESM.pdf [file 12944_2016_243_MOESM1_ESM.pdf]

Additional file 1: Table S1 - Differentially expressed probes between EA- and OA-stimulated cells.

| Probe set    | Gene                                                                                           | P value | Accession | EntrezGene        | Description  | EA/OA fold change |
|--------------|------------------------------------------------------------------------------------------------|---------|-----------|-------------------|--------------|-------------------|
| 225207_at    | PKD4                                                                                           | 0.033   | AV707102  | 5166              | Hs.8364.0    | 5.32              |
| 235805_at    | ACSS2                                                                                          | 0.000   | AA706922  |                   | Hs.189998.0  | 4.59              |
| 1557252_at   | CDNA FLJ36213 fis, clone THYMU2000671                                                          | 0.013   | AK093532  |                   | Hs2.114526.1 | 3.45              |
| 211019_s_at  | LSS                                                                                            | 0.011   | D63807    | 4047              | g1019365     | 3.2               |
| 205822_s_at  | HMGCS1                                                                                         | 0.017   | NM_002130 | 3157              | g4504428     | 3.07              |
| 1569496_s_at | SPON2                                                                                          | 0.001   | BC030552  | 10417             | Hs2.382136.1 | 2.98              |
| 204580_at    | MMP12                                                                                          | 0.043   | NM_002426 | 4321              | g4505206     | 2.9               |
| 221658_s_at  | IL21R                                                                                          | 0.000   | AF269133  | 50615             | g10801190    | 2.87              |
| 220675_s_at  | PNPLA3                                                                                         | 0.001   | NM_025225 | 80339             | g13376829    | 2.85              |
| 211162_x_at  | SCD                                                                                            | 0.029   | AF116616  | 6319              | g7959734     | 2.74              |
| 204103_at    | CCL4                                                                                           | 0.014   | NM_002984 | 6351              | g4506844     | 2.72              |
| 219971_at    | IL21R                                                                                          | 0.000   | NM_021798 | 50615             | g11141868    | 2.7               |
| 209122_at    | ADFP                                                                                           | 0.027   | BC005127  | 123               | g13477306    | 2.63              |
| 212272_at    | LPIN1                                                                                          | 0.021   | AA813260  | 23175             | Hs.81412.0   | 2.59              |
| 210173_at    | PTPRJ                                                                                          | 0.043   | D37781    | 5795              | g633072      | 2.58              |
| 217078_s_at  | CD300A                                                                                         | 0.001   | AJ010102  | 11314             | Hs.9688.1    | 2.57              |
| 212143_s_at  | IGFBP3                                                                                         | 0.005   | BF340228  | 3486              | Hs.77326.1   | 2.53              |
| 222486_s_at  | ADAMTS1                                                                                        | 0.005   | AF060152  | 9510              | g5725505     | 2.5               |
| 214038_at    | CCL8                                                                                           | 0.005   | A1984980  | 6355              | Hs.271387.0  | 2.47              |
| 210701_at    | CFDP1                                                                                          | 0.027   | D85939    | 10428             | g2114175     | 2.47              |
| 203027_s_at  | MVD                                                                                            | 0.009   | A1189359  | 4597              | Hs.3828.0    | 2.45              |
| 239439_at    | AFF4                                                                                           | 0.045   | BF963382  | 27125             | Hs.88808.0   | 2.45              |
| 203504_s_at  | ABCA1                                                                                          | 0.006   | NM_005502 | 19                | g5915657     | 2.37              |
| 234312_s_at  | ACSS2                                                                                          | 0.000   | AK000162  | 55902             | Hs.14779.1   | 2.36              |
| 205069_s_at  | ARHGAP26                                                                                       | 0.044   | NM_015071 | 23092             | g7662207     | 2.32              |
| 235779_at    | LOC284408                                                                                      | 0.041   | AW467077  | 284408            | Hs.103362.0  | 2.31              |
| 1556314_a_at | (clone 1NIB-4) normalized cDNA library sequence                                                | 0.037   | BQ002274  |                   | Hs2.224794.1 | 2.3               |
| 211018_at    | LSS                                                                                            | 0.002   | D63807    | 4047              | g1019365     | 2.28              |
| 211708_s_at  | SCD                                                                                            | 0.032   | BC005807  | 6319              | g13543283    | 2.27              |
| 238449_at    | LOC595101                                                                                      | 0.035   | BG534511  | 595101            | Hs.331640.0  | 2.26              |
| 1557418_at   | ACSL4                                                                                          | 0.030   | W95007    | 2182              | Hs2.269559.1 | 2.25              |
| 241716_at    | HSPD1                                                                                          | 0.018   | BF965447  | 3329              | Hs.160227.0  | 2.25              |
| 1552553_a_at | NLRC4                                                                                          | 0.010   | NM_021209 | 58484             | Hs2.23248.1  | 2.22              |
| 211506_s_at  | IL8                                                                                            | 0.013   | AF043337  | 3576              | g12641914    | 2.2               |
| 201169_s_at  | BHLHB2                                                                                         | 0.032   | BG326045  | 8553              | Hs.171825.0  | 2.2               |
| 1569392_at   | GPSN2                                                                                          | 0.025   | BC034484  | 9524              | Hs2.98153.1  | 2.2               |
| 237753_at    | IL21R                                                                                          | 0.001   | AW504569  |                   | Hs.126232.0  | 2.19              |
| 209875_s_at  | SPP1                                                                                           | 0.016   | M83248    | 6696              | g189150      | 2.18              |
| 1554152_a_at | OGDH                                                                                           | 0.032   | BC009580  | 4967              | Hs2.168669.2 | 2.18              |
| 232861_at    | PDP2                                                                                           | 0.042   | AB037769  | 57546             | Hs.232696.0  | 2.17              |
| 233030_at    | PNPLA3                                                                                         | 0.002   | AK025665  | 80339             | Hs.266738.1  | 2.14              |
| 228575_at    | IL20RB                                                                                         | 0.042   | AL578102  | 53833             | Hs.61232.0   | 2.14              |
| 239358_at    | FDFT1                                                                                          | 0.034   | BE645256  |                   | Hs.94151.0   | 2.12              |
| 225742_at    | MDM4                                                                                           | 0.051   | W93501    | 4194              | Hs.31433.0   | 2.08              |
| 215791_at    | Chromosome 21q22.1 anonymous mRNA sequence                                                     | 0.028   | AF003738  |                   | Hs.268526.0  | 2.08              |
| 202218_s_at  | FADS2                                                                                          | 0.001   | NM_004265 | 9415              | g4758333     | 2.07              |
| 216598_s_at  | CCL2                                                                                           | 0.012   | S69738    | 6347              | Hs.303649.1  | 2.07              |
| 221211_s_at  | C21orf7                                                                                        | 0.001   | NM_020152 | 56911             | g9910145     | 2.07              |
| 1555996_s_at | EIF4A2                                                                                         | 0.044   | A1332397  | 1974              | Hs2.410186.1 | 2.07              |
| 222838_at    | SLAMF7                                                                                         | 0.011   | AL121985  | 57823             | Hs.132906.0  | 2.05              |
| 222162_s_at  | ADAMTS1                                                                                        | 0.009   | AK023795  | 9510              | Hs.8230.1    | 2.04              |
| 1553137_s_at | KLF11                                                                                          | 0.028   | AF028008  | 8462              | Hs2.408442.1 | 2.03              |
| 1554948_at   | Hs2.375076.1                                                                                   | 0.028   | BC034024  |                   | Hs2.375076.1 | 2.02              |
| 222209_s_at  | TMEM135                                                                                        | 0.001   | AK000684  | 65084             | Hs.183887.1  | 2.01              |
| 208860_s_at  | ATRX /// LOC728849                                                                             | 0.001   | U09820    | 546 ///<br>728849 | g606832      | -2.01             |
| 204840_s_at  | EEA1                                                                                           | 0.000   | A1916242  | 8411              | Hs.2864.0    | -2.01             |
| 232297_at    | CDNA FLJ11313 fis, clone PLACE1010106, highly similar to Homo sapiens mRNA; cDNA DKFZp586M1418 | 0.003   | AL049385  |                   | Hs.272251.0  | -2.02             |
| 227987_at    | VPS13A                                                                                         | 0.000   | AW629014  | 23230             | Hs.65919.0   | -2.02             |
| 221078_s_at  | CCDC88A                                                                                        | 0.022   | NM_018084 | 55704             | g8922402     | -2.02             |
| 1552309_a_at | NEXN                                                                                           | 0.002   | NM_144573 | 91624             | Hs2.216381.1 | -2.02             |

|              |                                                                   |       |           |                   |              |       |
|--------------|-------------------------------------------------------------------|-------|-----------|-------------------|--------------|-------|
| 225045_at    | CCDC88A                                                           | 0.002 | AB033038  | 55704             | Hs.20887.1   | -2.03 |
| 201731_s_at  | TPR                                                               | 0.001 | NM_003292 | 7175              | g4507658     | -2.04 |
| 210962_s_at  | AKAP9                                                             | 0.004 | AB019691  | 10142             | g5051742     | -2.04 |
| 215220_s_at  | TPR                                                               | 0.034 | AK023111  | 7175              | Hs.306642.0  | -2.04 |
| 214700_x_at  | RIF1                                                              | 0.008 | AK000323  | 55183             | Hs.225841.1  | -2.05 |
| 236623_at    | C1orf203                                                          | 0.027 | AI367432  | 84852             | Hs.133509.0  | -2.05 |
| 1569652_at   | MLLT3                                                             | 0.030 | BC030550  | 4300              | Hs2.382134.1 | -2.05 |
| 231872_at    | LRRCC1                                                            | 0.006 | T52285    | 85444             | Hs.193115.0  | -2.06 |
| 213239_at    | C13orf24                                                          | 0.001 | NM_006346 | 10464             | Hs.43913.0   | -2.07 |
| 204841_s_at  | EEA1                                                              | 0.031 | NM_003566 | 8411              | g4503468     | -2.07 |
| 242352_at    | NIPBL                                                             | 0.008 | AW272262  | 25836             | Hs.250468.0  | -2.08 |
| 230165_at    | SGOL2                                                             | 0.005 | N31731    | 151246            | Hs.44269.0   | -2.1  |
| 236620_at    | RIF1                                                              | 0.003 | AU150841  | 55183             | Hs.254020.0  | -2.1  |
| 1562484_at   | FLJ35848                                                          | 0.000 | BC041481  | 284071            | Hs2.309103.3 | -2.11 |
| 207828_s_at  | CENPF                                                             | 0.002 | NM_005196 | 1063              | g4885132     | -2.12 |
| 1564776_at   | LENG10                                                            | 0.001 | AF211977  | 94057             | Hs2.404144.1 | -2.12 |
| 1552680_a_at | CASC5                                                             | 0.002 | NM_020380 | 57082             | Hs2.283099.2 | -2.12 |
| 222313_at    | CNOT3                                                             | 0.002 | AW972359  |                   | Hs.293334.0  | -2.13 |
| 1562230_at   | Full length insert cDNA clone YI60C11                             | 0.007 | AF147390  |                   | Hs2.384152.1 | -2.14 |
| 236128_at    | ZNF91                                                             | 0.009 | AI672373  | 7644              | Hs.183950.0  | -2.15 |
| 230020_at    | LSM8                                                              | 0.002 | AI536000  |                   | Hs.122460.0  | -2.15 |
| 227934_at    | Hs.24252.0                                                        | 0.003 | AI769559  |                   | Hs.24252.0   | -2.16 |
| 238443_at    | TFAM                                                              | 0.038 | BE546873  | 7019              | Hs.198113.0  | -2.16 |
| 218859_s_at  | ESF1                                                              | 0.004 | NM_016649 | 51575             | g7705402     | -2.18 |
| 243509_at    | BTG1                                                              | 0.031 | AI475680  |                   | Hs.105676.0  | -2.18 |
| 204291_at    | ZNF518                                                            | 0.000 | NM_014803 | 9849              | g7662059     | -2.2  |
| 205046_at    | CENPE                                                             | 0.013 | NM_001813 | 1062              | g4502780     | -2.21 |
| 238759_at    | CCDC88A                                                           | 0.032 | AI681810  | 55704             | Hs.244532.0  | -2.21 |
| 226604_at    | TMTC3                                                             | 0.002 | AA418403  | 160418            | Hs.29643.0   | -2.22 |
| 241853_at    | Transcribed locus                                                 | 0.001 | AA760878  |                   | Hs.38485.0   | -2.22 |
| 1553725_s_at | ZNF644                                                            | 0.031 | NM_016620 | 84146             | Hs2.334470.1 | -2.23 |
| 201057_s_at  | GOLGB1                                                            | 0.002 | NM_004487 | 2804              | g4758453     | -2.24 |
| 228709_at    | TPR                                                               | 0.001 | BF109993  | 7175              | Hs.218791.1  | -2.24 |
| 213957_s_at  | CEP350                                                            | 0.025 | AA635523  | 9857              | Hs.92200.1   | -2.25 |
| 209778_at    | TRIP11                                                            | 0.011 | AF007217  | 9321              | g2253416     | -2.26 |
| 205235_s_at  | MPHOSPH1                                                          | 0.011 | NM_016195 | 9585              | g7705347     | -2.27 |
| 209172_s_at  | CENPF                                                             | 0.010 | U30872    | 1063              | g1000093     | -2.28 |
| 235427_at    | CASP8                                                             | 0.002 | AA418074  |                   | Hs.110286.0  | -2.28 |
| 1558293_at   | KIAA1107                                                          | 0.003 | BC037317  | 23285             | Hs2.398145.1 | -2.28 |
| 201567_s_at  | GOLGA4                                                            | 0.003 | NM_002078 | 2803              | g6715599     | -2.31 |
| 208859_s_at  | ATRX /// LOC728849                                                | 0.005 | AI650257  | 546 ///<br>728849 | Hs.96264.0   | -2.31 |
| 235009_at    | FAM44A                                                            | 0.008 | AI049791  | 259282            | Hs.205442.0  | -2.31 |
| 230064_at    | Transcribed locus                                                 | 0.005 | AW296421  |                   | Hs.121035.0  | -2.31 |
| 233219_at    | CDNA FLJ13365 fis, clone PLACE1000332                             | 0.000 | AK023427  |                   | Hs.306646.0  | -2.33 |
| 215767_at    | ZNF804A                                                           | 0.003 | AF052145  | 91752             | Hs.159528.0  | -2.34 |
| 229066_at    | Transcribed locus                                                 | 0.001 | AA694209  |                   | Hs.67197.0   | -2.34 |
| 1556744_a_at | ZNF654                                                            | 0.000 | AI732587  | 55279             | Hs2.118758.1 | -2.35 |
| 219918_s_at  | ASPM                                                              | 0.002 | NM_018123 | 259266            | g8922484     | -2.36 |
| 202319_at    | SENP6                                                             | 0.003 | NM_015571 | 26054             | g7662311     | -2.37 |
| 241820_at    | RIF1                                                              | 0.023 | BF666241  | 55183             | Hs.254020.1  | -2.37 |
| 239236_at    | PHF10                                                             | 0.008 | BE465277  |                   | Hs.280730.0  | -2.37 |
| 213222_at    | PLCB1                                                             | 0.002 | AL049593  | 23236             | Hs.41143.0   | -2.38 |
| 219469_at    | DYNC2H1                                                           | 0.001 | NM_024606 | 79659             | g13375812    | -2.39 |
| 207117_at    | ZNF117                                                            | 0.023 | NM_015852 | 51351             | g7705388     | -2.42 |
| 238853_at    | RAB3IP                                                            | 0.010 | AI436813  | 117177            | Hs.283645.0  | -2.42 |
| 201730_s_at  | TPR                                                               | 0.005 | BF110993  | 7175              | Hs.169750.0  | -2.43 |
| 236395_at    | MEF2C                                                             | 0.002 | AI523245  |                   | Hs.127638.0  | -2.43 |
| 231855_at    | KIAA1524                                                          | 0.006 | AB040957  | 57650             | Hs.151343.0  | -2.43 |
| 236160_at    | hypothetical LOC341378; thyroid hormone receptor<br>interactor 11 | 0.006 | AA765470  |                   | Hs.122826.0  | -2.43 |
| 214727_at    | BRCA2                                                             | 0.003 | X95152    | 675               | Hs.34012.1   | -2.44 |
| 1558250_s_at | CDNA FLJ40891 fis, clone UTERU2001110                             | 0.000 | AI538880  |                   | Hs2.399730.1 | -2.46 |
| 219644_at    | CCDC41                                                            | 0.001 | NM_016122 | 51134             | g7705838     | -2.46 |
| 205250_s_at  | CEP290                                                            | 0.006 | NM_014684 | 80184             | g7662079     | -2.5  |

|              |         |       |           |       |               |       |
|--------------|---------|-------|-----------|-------|---------------|-------|
| 206931_at    | ZNF141  | 0.004 | NM_003441 | 7700  | g4507992      | -2.52 |
| 212289_at    | ANKRD12 | 0.005 | AB020681  | 23253 | Hs.27973.0    | -2.53 |
| 205705_at    | ANKRD26 | 0.008 | AL137351  | 22852 | Hs.129218.0   | -2.55 |
| 1555352_at   | FOXP2   | 0.012 | AF467257  | 93986 | Hs2Affx.1.231 | -2.56 |
| 208393_s_at  | RAD50   | 0.001 | NM_005732 | 10111 | g5032016      | -2.61 |
| 219754_at    | RBM41   | 0.006 | NM_018301 | 55285 | g8922825      | -2.64 |
| 1557227_s_at | TPR     | 0.017 | AW235355  | 7175  | Hs2.433856.1  | -2.65 |
| 216563_at    | ANKRD12 | 0.023 | X80821    | 23253 | Hs.302177.0   | -2.65 |
| 233078_at    | API5    | 0.003 | AK021649  | 8539  | Hs.122518.0   | -2.66 |
| 205706_s_at  | ANKRD26 | 0.005 | NM_014915 | 22852 | g7662473      | -2.8  |
| 232760_at    | TEX15   | 0.007 | AL133653  | 56154 | Hs.272315.0   | -2.97 |
| 212286_at    | ANKRD12 | 0.016 | AW572909  | 23253 | Hs.27973.0    | -3.2  |
| 220095_at    | C9orf39 | 0.010 | NM_017738 | 54875 | g8923250      | -3.56 |
| 233011_at    | ANXA1   | 0.022 | AU155094  | 301   | Hs.287558.0   | -3.73 |

**Additional file 1: Table S2 - Genes differentially expressed in EA- and OA-stimulated cells for the significantly enriched functional gene categories listed in main text Table 1.**

| <b>Gene</b>                                                |                      | <b>Function</b>                                                                                                             |
|------------------------------------------------------------|----------------------|-----------------------------------------------------------------------------------------------------------------------------|
| <b>Up-regulated by EA</b>                                  |                      |                                                                                                                             |
| 3-hydroxy-3-methylglutaryl-Coenzyme A synthase 1 (soluble) | HMGCS1               | Participates in cholesterol synthesis                                                                                       |
| acyl-CoA synthetase short-chain family member 2            | ACSS2                | Produces acetyl-CoA from acetate for lipid synthesis                                                                        |
| farnesyl-diphosphate farnesyltransferase 1                 | FDFT1                | First specific enzyme in cholesterol biosynthesis, forms squalene                                                           |
| fatty acid desaturase 2                                    | FADS2                | Regulates FA desaturation                                                                                                   |
| glycoprotein, synaptic 2                                   | TECR                 | Participates in FA elongation                                                                                               |
| hydroxysteroid (17-beta) dehydrogenase 12                  | HSD17B12             | Participates in FA elongation and in the conversion of estrone to estradiol                                                 |
| lanosterol synthase (2,3-oxidosqualene-lanosterol cyclase) | LSS                  | Participates in the synthesis of cholesterol, steroid hormones, and vitamin D                                               |
| mevalonate (diphospho) decarboxylase                       | MVD                  | catalyzes the conversion of mevalonate pyrophosphate into isopentenyl pyrophosphate in cholesterol biosynthesis             |
| patatin-like phospholipase domain containing 3             | PNPLA3               | Triacylglycerol lipase (adipocyte)                                                                                          |
| stearoyl-CoA desaturase (delta-9-desaturase)               | SCD                  | Participates in FA biosynthesis                                                                                             |
| ATP binding cassette subfamily A member 1                  | ABCA1                | Participates in cellular lipid removal by promoting cholesterol efflux                                                      |
| <b>Down-regulated by EA</b>                                |                      |                                                                                                                             |
| shugoshin-like 2 (S. pombe)                                | SGOL2                | Participates in chromosome segregation in meiosis                                                                           |
| leucine rich repeat and coiled-coil centrosomal protein 1  | LRRCC1               | Associates with the centrosome during mitosis                                                                               |
| Nipped-B homolog (Drosophila)                              | NIPBL                | Participates in sister chromatid cohesion, chromosome condensation and DNA repair. Linked to the Cornelia de Lange syndrome |
| testis expressed 15                                        | TEX15                | Involved in meiosis                                                                                                         |
| centromere protein F                                       | CENPF                | May play a role in chromosome segregation during mitosis                                                                    |
| centromere protein E                                       | CENPE                | Participates in chromosome segregation in mitosis                                                                           |
| abnormal spindle microtubule assembly                      | ASPM                 | Essential for normal mitotic spindle function                                                                               |
| kinesin family member 20B                                  | KIF20B<br>(MPHOSPH1) | Required for cytokinesis                                                                                                    |
| RAD50 double strand break repair protein                   | RAD50                | Pleiotropic, participates in cell cycle checkpoint activation                                                               |
| replication timing regulatory factor 1                     | RIF1                 | Regulates DNA replication and repair                                                                                        |
| cancer susceptibility candidate 5                          | CASC5                | Participates in chromosome segregation in mitosis                                                                           |

**Additional file 1: Table S3 - Primers used in RT-PCR and bisulfite-modified DNA sequencing.**

---

| RT-PCR         |                                                     |
|----------------|-----------------------------------------------------|
| Gene           | Primer                                              |
| <i>ADFP</i>    | TCCTCAATCCTGTCTAGCCC<br>GAGATGGCAGAGAACGGTGT        |
| <i>ANKRD12</i> | AACCCAGATTTGGGCATTTT<br>CGAAGACAACGACAGCGAC         |
| <i>ANKRD26</i> | ATGCCTGGCTTTGTTGGTT<br>TTGTGGTTGAAAGCCTTCCT         |
| <i>ANXA1</i>   | CACCTTTGGATGACTTCACAGT<br>TCTTTGCAAGAAGGTAGAGATAAAG |
| <i>API5</i>    | GAGCTGCTAATCGCTTTTCC<br>CTCACCATGCCGACAGTAGA        |
| <i>CCL4</i>    | GATTCCTGCGGATCAGCACA<br>CTTTTCTTACACCGCGAGGA        |
| <i>GAPDH</i>   | AATGAAGGGGTCATTGATGG<br>AAGGTGAAGGTCGGAGTCAA        |
| <i>HMGCS1</i>  | CTTCAGGTTCTGCTGCTGTG<br>CAGAAGAACTTACGCTCGGC        |
| <i>IGFBP3</i>  | CTTGGGATCAGACACCCG<br>GTCAACGCTAGTGCCGTCAG          |
| <i>IL21R</i>   | AATCGGTGTAGCAGACGAGG<br>AGCACACGGAATGGATTTCT        |
| <i>PDK4</i>    | CACGATGTGAATTGGTTGGT<br>TGATGTGGTAGCAGTGGTCC        |
| <i>SPON2</i>   | TAGCGAGTCCTGCTCTTGGT<br>CCAGCAGGGACAATGAGATT        |

---

| Bisulfite-modified DNA sequencing |                                                     |
|-----------------------------------|-----------------------------------------------------|
| Gene                              | Primer                                              |
| <i>ADFP</i>                       | TGTTGGTAGGAAAGAAGTTTTAA<br>CCAATTAATAAAAACTCCCC     |
| <i>ANKRD12</i>                    | GTGTAAAAATAATAGGTGAA<br>CAAACACTATCCRACAAAAA        |
| <i>ANKRD26</i>                    | TTGGGTGGTTTTTATAAAAG<br>CATAAAATATCTCTAAAACCC       |
| <i>ANXA1</i>                      | CACCTTTGGATGACTTCACAGT<br>TCTTTGCAAGAAGGTAGAGATAAAG |
| <i>API5</i>                       | GGGTTTTTTAATAGTATAGG<br>CTTAACTTAACTACAACTCT        |
| <i>PDK4</i>                       | AAATGTTTTATTTTTYGGGGTAT<br>AACTCCTCCTATTTAAACT      |
| <i>SPON2</i>                      | GGGATTAGATTTTTAAAGTT<br>AACTAAAACCTCATTAACC         |

---

Primer sequences are 5'-3'. R = A or G. Y = C or T.
